# Supplementary material for: Process-based modelling of the methane balance in periglacial landscapes with JSBACH
Source: Copernicus journal article supplement (doi:10.5194/gmd-2016-103), 2016-06-02
Supplement: Supplementary file [file gmd-2016-103-AC1-supplement.pdf]

*Note: in the following document, the original comments made by the reviewer are copied in black, while the authors' responses to these comments follow in blue.*

## **Authors' response to comments provided by the Executive editor**

In my role as Executive editor of GMD, I would like to bring to your attention our Editorial version 1.1: <http://www.geosci-model-dev.net/8/3487/2015/gmd-8-3487-2015.html>

This highlights some requirements of papers published in GMD, which is also available on the GMD website in the 'Manuscript Types' section:  
[http://www.geoscientific-model-development.net/submission/manuscript\\_types.html](http://www.geoscientific-model-development.net/submission/manuscript_types.html)

In particular, please note that for your paper, the following requirement has not been met in the Discussions paper: "The main paper must give the model name and version number (or other unique identifier) in the title.". Please add a version number for JSBACH in the title upon your revised submission to GMD.

The authors thank the Executive Editor for pointing out this missing element in our submitted manuscript. We decided to use 'JSBACH-methane' as our unique model identifier. The title of the revised manuscript will accordingly be modified to "Process-based modelling of the methane balance in periglacial landscapes with JSBACH-methane".
